# Supplementary material for: Therapeutic drug monitoring of CT-P13: a comparison of four different immunoassays
Source: PubMed Central journal article supplement — Ther Adv Gastroenterol. 2017 Aug 11;10(9):661–71. doi: 10.1177/1756283X17722915 (PMC5598811; doi:10.1177/1756283x17722915), 2017-08-11
Supplement: SupplementaryTables_R1_915.pdf [file SupplementaryTables_R1_915.pdf]

**Supplementary Table 1:** Intraclass correlation coefficient stratified by therapeutic phase (induction\* vs maintenance).

|                                   | ICC   |             | Differences |              |
|-----------------------------------|-------|-------------|-------------|--------------|
|                                   | ICC   | IC 95%      | average     | IC 95%       |
| <b><i>in house-Sanquin</i></b>    |       |             |             |              |
| Induction                         | 0.660 | 0.397-0.808 | -7.70       | -10.56 -4.84 |
| Maintenance                       | 0.607 | 0.431-0.728 | .08         | -.96 1.12    |
| <b><i>in house-QB</i></b>         |       |             |             |              |
| Induction                         | 0.857 | 0.747-0.919 | -3.30       | -4.71 -1.89  |
| Maintenance                       | 0.846 | 0.777-0.893 | -.60        | -1.24 .05    |
| <b><i>In house-r-biopharm</i></b> |       |             |             |              |
| Induction                         | 0.842 | 0.719-0.911 | -.12        | -1.35 1.10   |
| Maintenance                       | 0.877 | 0.822-0.915 | -1.33       | -1.91 -.74   |
| <b>Sanquin-QB</b>                 |       |             |             |              |
| Induction                         | 0.842 | 0.720-0.911 | 4.40        | 2.24 6.56    |
| Maintenance                       | 0.860 | 0.797-0.903 | -.68        | -1.38 .03    |
| <b>Sanquin-r-biopharm</b>         |       |             |             |              |
| Induction                         | 0.622 | 0.330-0.787 | 7.58        | 4.74 10.41   |
| Maintenance                       | 0.791 | 0.698-0.856 | -1.41       | -2.25 -.57   |
| <b>QB-r-biopharm</b>              |       |             |             |              |
| Induction                         | 0.897 | 0.818-0.942 | 3.18        | 2.08 4.28    |
| Maintenance                       | 0.930 | 0.898-0.951 | -.73        | -1.20 -.26   |

\* samples taken before the first IFX infusion were excluded from this analysis.

**Supplementary Table 2:** Qualitative comparison between the CT-P13 quantification assays using the therapeutic interval 3-7 (i.e., <3, [3-7[, and ≥7) and stratified by therapeutic phase (induction\* vs maintenance).

|                   | Accuracy   | Kappa [CI 95%]             |
|-------------------|------------|----------------------------|
| <i>in house</i>   |            |                            |
| <b>Sanquin</b>    | <b>75%</b> | <b>0.597 [0.496-0.698]</b> |
| Induction         | 84%        | 0.670 [0.441-0.899]        |
| Maintenance       | 68%        | 0.578 [0.468-0.688]        |
| <b>QB</b>         | <b>80%</b> | <b>0.776 [0.177-0.840]</b> |
| Induction         | 89%        | 0.785 [0.587-0.982]        |
| Maintenance       | 71%        | 0.676 [0.585-0.767]        |
| <b>r-biopharm</b> | <b>77%</b> | <b>0.752 [0.685-0.819]</b> |
| Induction         | 91%        | 0.817 [0.630-1.000]        |
| Maintenance       | 67%        | 0.639 [0.545-0.733]        |
| <b>Sanquin</b>    |            |                            |
| <b>QB</b>         | <b>80%</b> | <b>0.671 [0.577-0.766]</b> |
| Induction         | 92%        | 0.857 [0.725-0.989]        |
| Maintenance       | 71%        | 0.653 [0.548-0.758]        |
| <b>r-biopharm</b> | <b>77%</b> | <b>0.622 [0.522-0.721]</b> |
| Induction         | 92%        | 0.818 [0.637-0.999]        |
| Maintenance       | 66%        | 0.570 [0.461-0.679]        |
| <b>QB</b>         |            |                            |
| <b>r-biopharm</b> | <b>88%</b> | <b>0.874 [0.824-0.922]</b> |
| Induction         | 98%        | 0.959 [0.878-1.000]        |
| Maintenance       | 81%        | 0.799 [0.723-0.876]        |

\* samples taken before the first IFX infusion were excluded from this analysis.
