# Supplementary figures and images for: Therapeutic drug monitoring of CT-P13: a comparison of four different immunoassays
Source: PubMed Central journal article supplement — Ther Adv Gastroenterol. 2017 Aug 11;10(9):661–71. doi: 10.1177/1756283X17722915 (PMC5598811; doi:10.1177/1756283x17722915), 2017-08-11

Supplementary Fig. 2

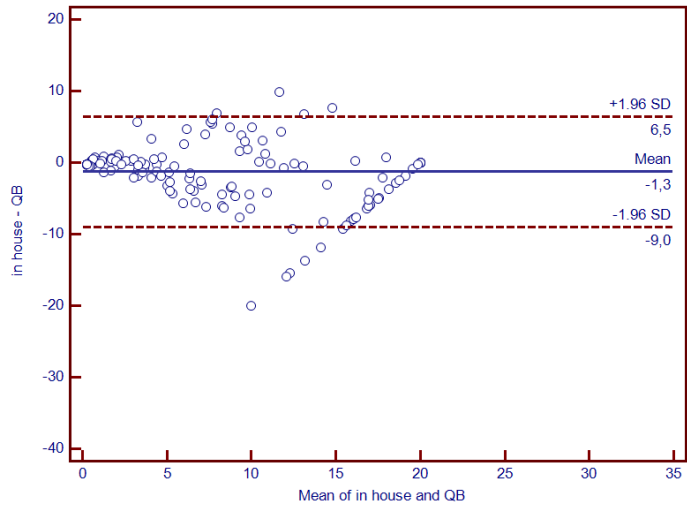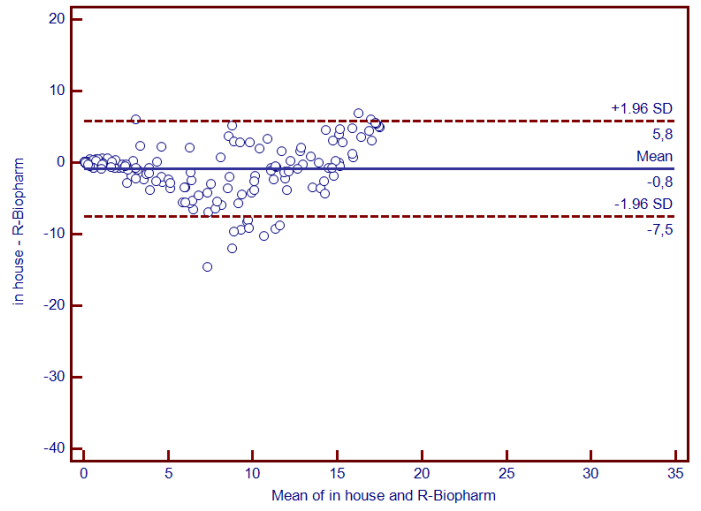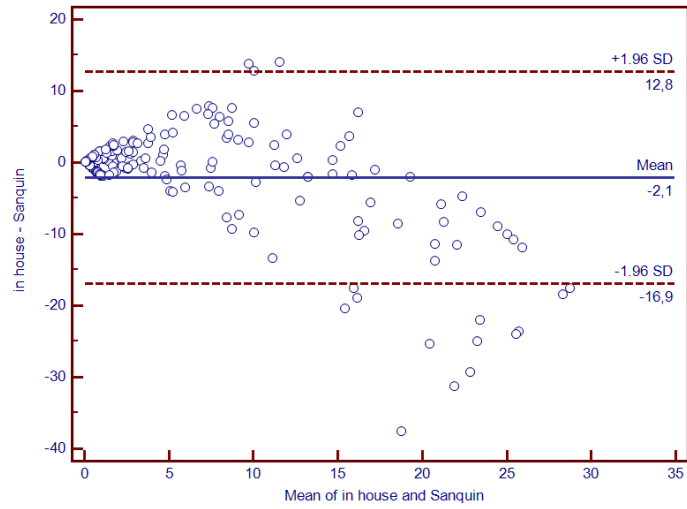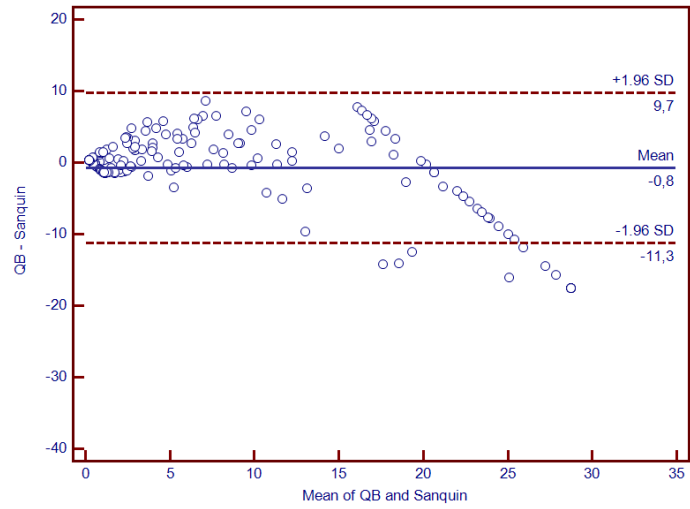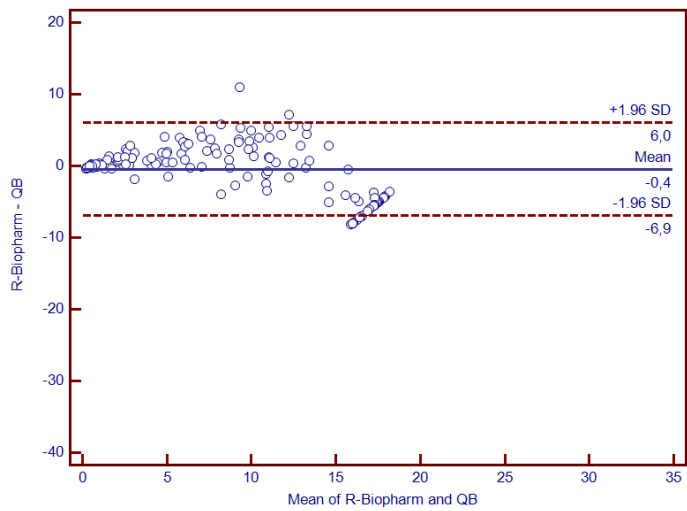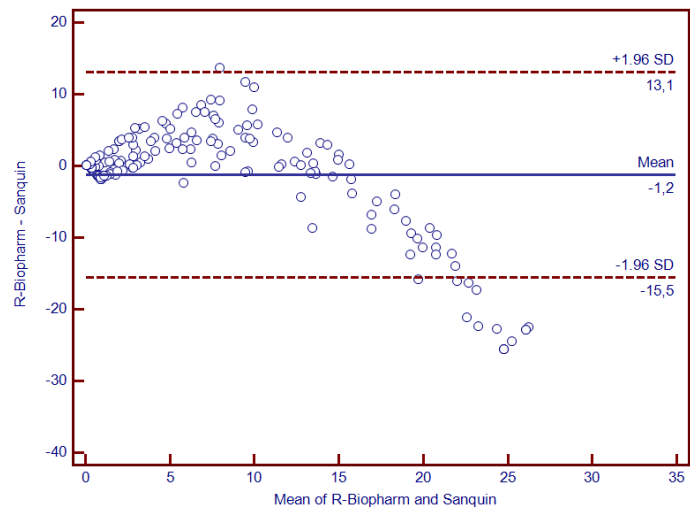

Supplement: supfig2_915.pdf [file supfig2_915.pdf]
